# Supplementary material
Source: publisher figshare collection journal article supplement (https://acs.figshare.com/ndownloader/files/14303495)
Supplement: Supplementary file 1 [file 14303495]

# Green Anti-solvent Processed Efficient Flexible Perovskite Solar Cells

*Deyu Xin, Zenghua Wang, Min Zhang, Xiaojia Zheng, Yong Qin, Jianguo Zhu, Wen-Hua Zhang*

Total number of pages: 11

Total number of figures: 10

## Contents

|                                                                                                                                                                                                                                                                                   |    |
|-----------------------------------------------------------------------------------------------------------------------------------------------------------------------------------------------------------------------------------------------------------------------------------|----|
| Figure S1. Photograph of SnO <sub>2</sub> solutions diluted by H <sub>2</sub> O/TBA mixture with various volume ratios. ....                                                                                                                                                      | 2  |
| Figure S2. FTIR spectra of SnO <sub>2</sub> films prepared by SnO <sub>2</sub> -colloid precursor diluted with water and water/TBA mixture. ....                                                                                                                                  | 3  |
| Figure S3. SEM images for perovskite films prepared on SnO <sub>2</sub> ETLs: (a) SnO <sub>2</sub> -control and (b) SnO <sub>2</sub> -TBA. ....                                                                                                                                   | 4  |
| Figure S4. I-V characteristics and corresponding resistivity for SnO <sub>2</sub> ETLs. ....                                                                                                                                                                                      | 5  |
| Figure S5. J-V curves for PSC on glass/ ITO based on SnO <sub>2</sub> -control under different scan directions. PSCs were fabricated by PhOMe green anti-solvent. ....                                                                                                            | 6  |
| Figure S6. J-V curves for PSC on glass/ ITO based on SnO <sub>2</sub> -TBA under different scan directions. PSCs were fabricated by PhOMe green anti-solvent. ....                                                                                                                | 7  |
| Figure S7. Equivalent circuit diagram used to fit the Nyquist plots. ....                                                                                                                                                                                                         | 8  |
| Figure S8. J-V curves for PSC on glass/ ITO based on SnO <sub>2</sub> -TBA under different scan directions. PSCs were fabricated by CB anti-solvent. ....                                                                                                                         | 9  |
| Figure S9. J-V curves for PSC on glass/ ITO based on SnO <sub>2</sub> -control under different scan directions. The glass/ ITO substrate was treated by UVO for 15 min just before the deposition of SnO <sub>2</sub> ETL. PSCs were fabricated by PhOMe green anti-solvent. .... | 10 |
| Figure S10. J-V curves of the flexible PSC for fresh device and PSC after 2000 h dark storage in ambient air (~20% RH) without encapsulation. ....                                                                                                                                | 11 |

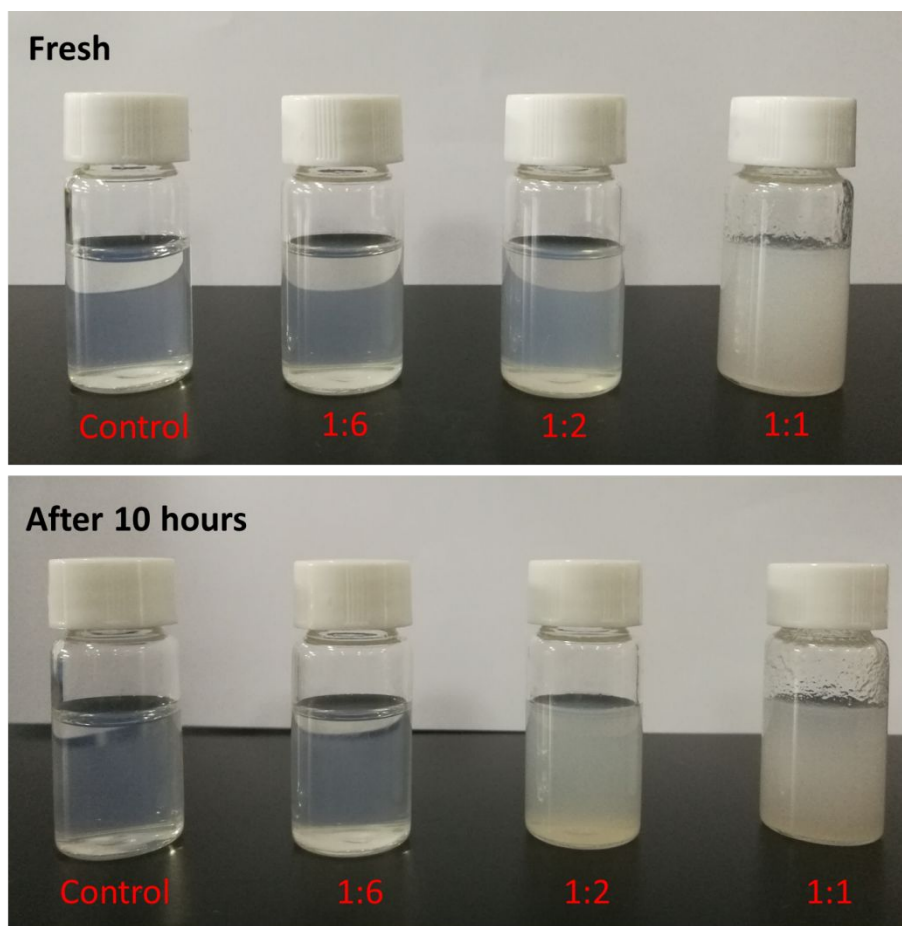

**Figure S1.** Photograph of  $\text{SnO}_2$  solutions diluted by  $\text{H}_2\text{O}$ /TBA mixture with various volume ratios.

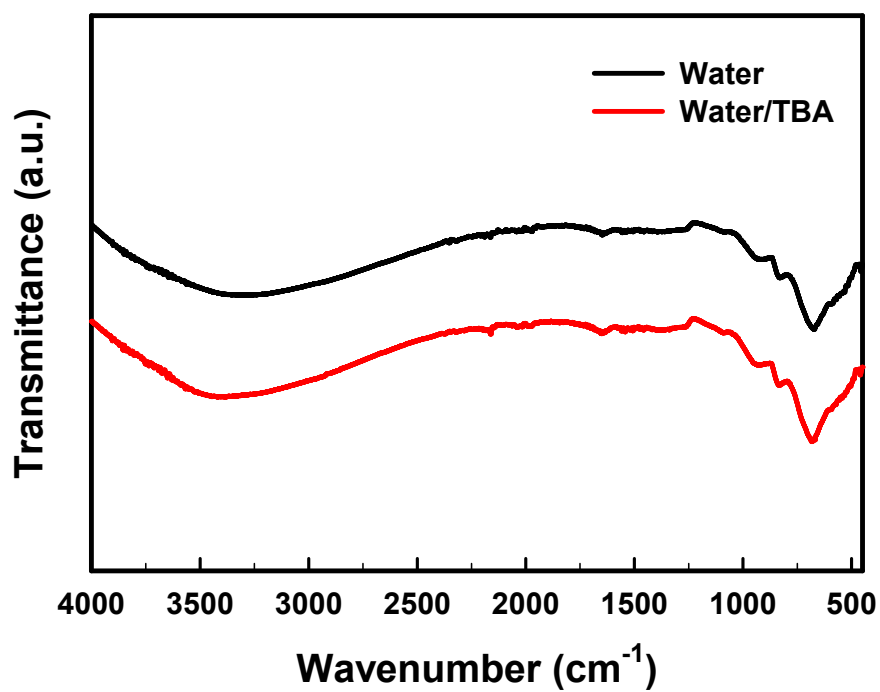

**Figure S2.** FTIR spectra of SnO<sub>2</sub> films prepared by SnO<sub>2</sub>-colloid precursor diluted with water and water/TBA mixture.

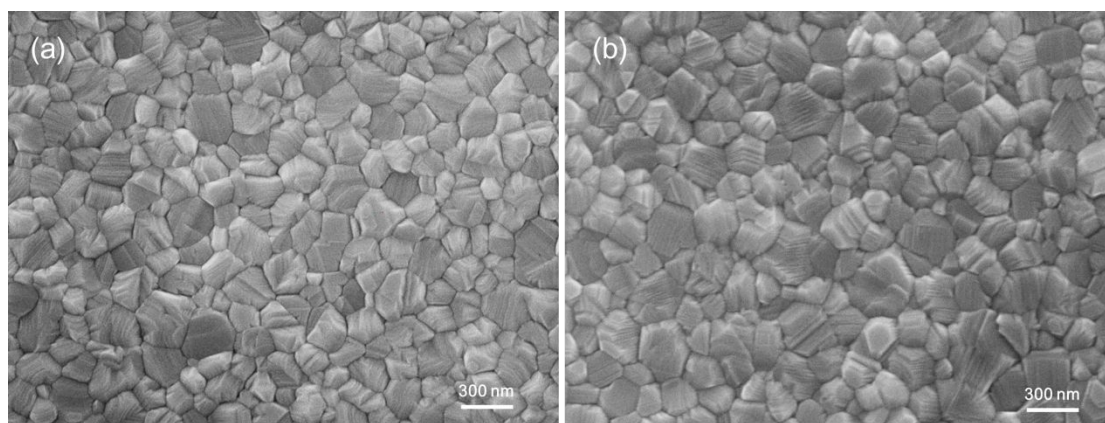

**Figure S3.** SEM images for perovskite films prepared on  $\text{SnO}_2$  ETLs: (a)  $\text{SnO}_2$ -control and (b)  $\text{SnO}_2$ -TBA.

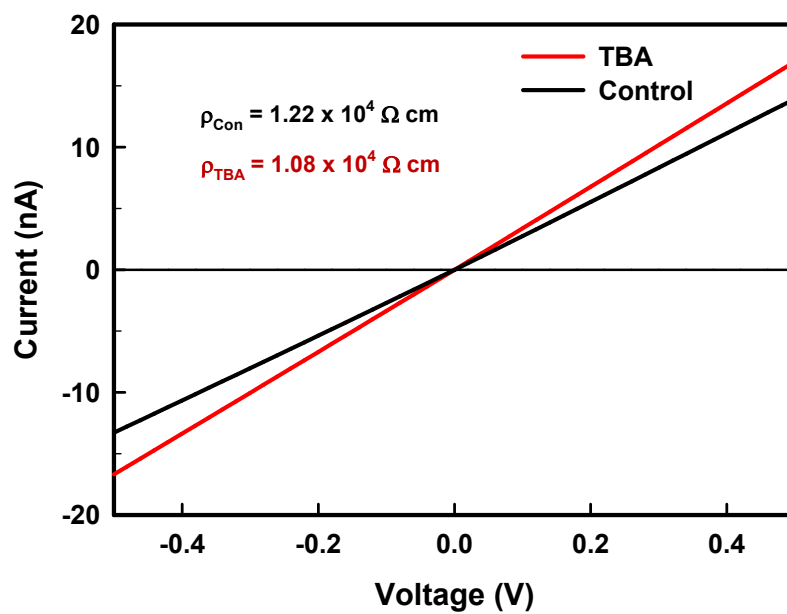

**Figure S4.** I-V characteristics and corresponding resistivity for SnO<sub>2</sub> ETLs.

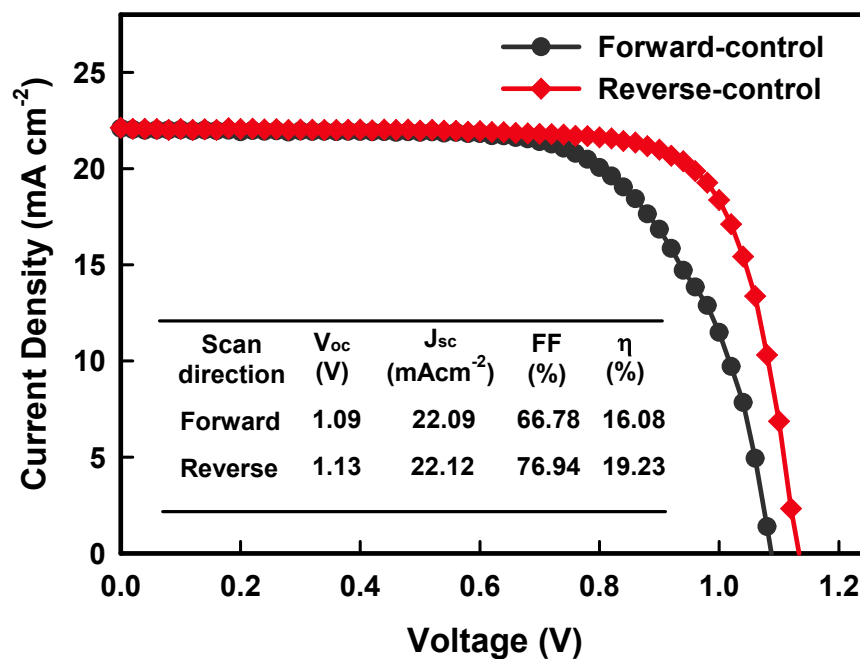

**Figure S5.** J–V curves for PSC on glass/ ITO based on  $\text{SnO}_2$ -control under different scan directions. PSCs were fabricated by PhOMe green anti-solvent.

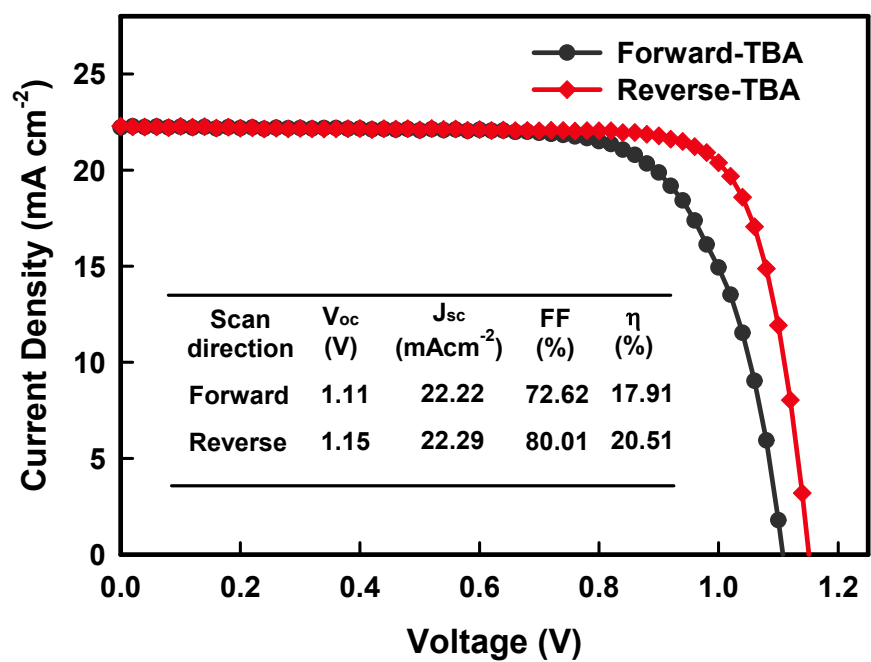

Figure S6. J–V curves for PSC on glass/ ITO based on SnO<sub>2</sub>-TBA under different scan directions. PSCs were fabricated by PhOMe green anti-solvent.

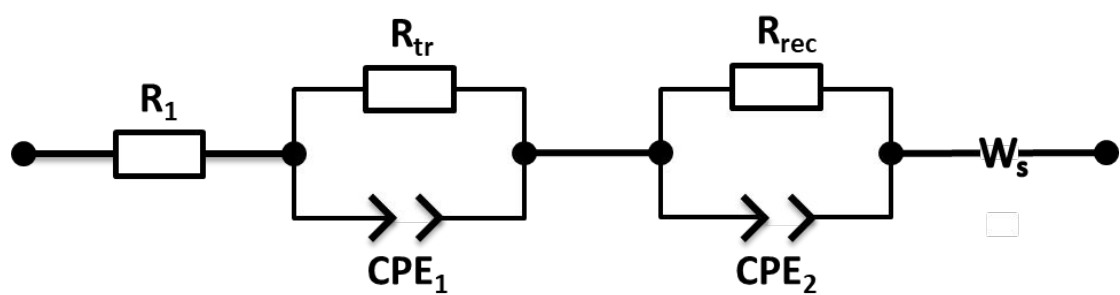

**Figure S7.** Equivalent circuit diagram used to fit the Nyquist plots.



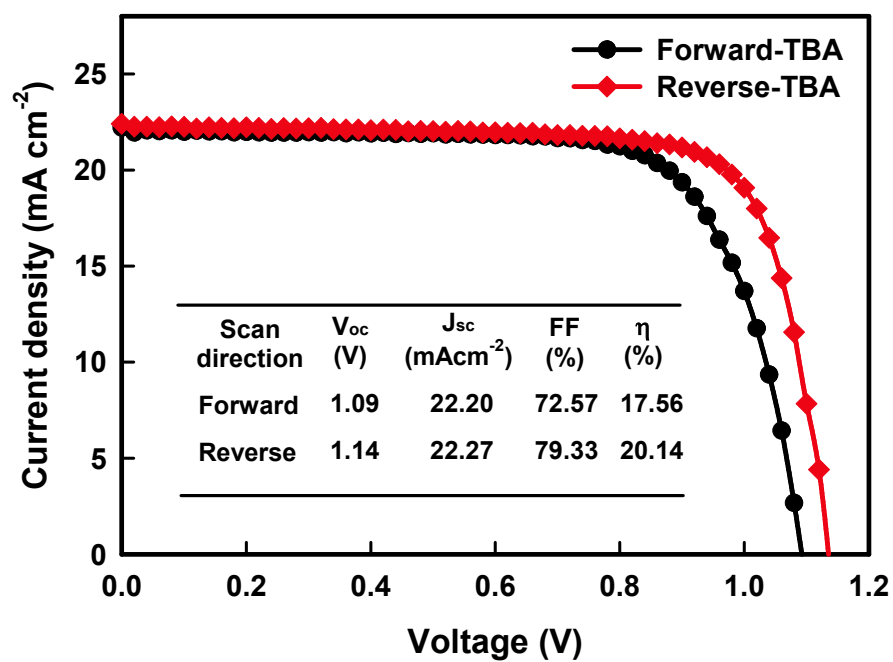

**Figure S8.** J–V curves for PSC on glass/ ITO based on  $\text{SnO}_2$ -TBA under different scan directions. PSCs were fabricated by CB anti-solvent.

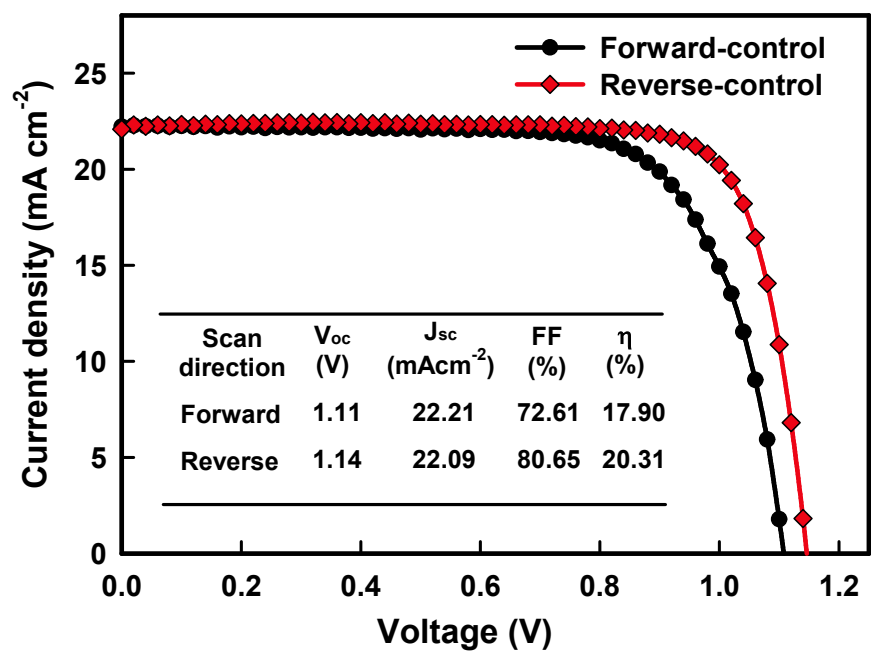

**Figure S9.** J–V curves for PSC on glass/ ITO based on  $\text{SnO}_2$ -control under different scan directions. The glass/ ITO substrate was treated by UVO for 15 min just before the deposition of  $\text{SnO}_2$  ETL. PSCs were fabricated by PhOMe green anti-solvent.

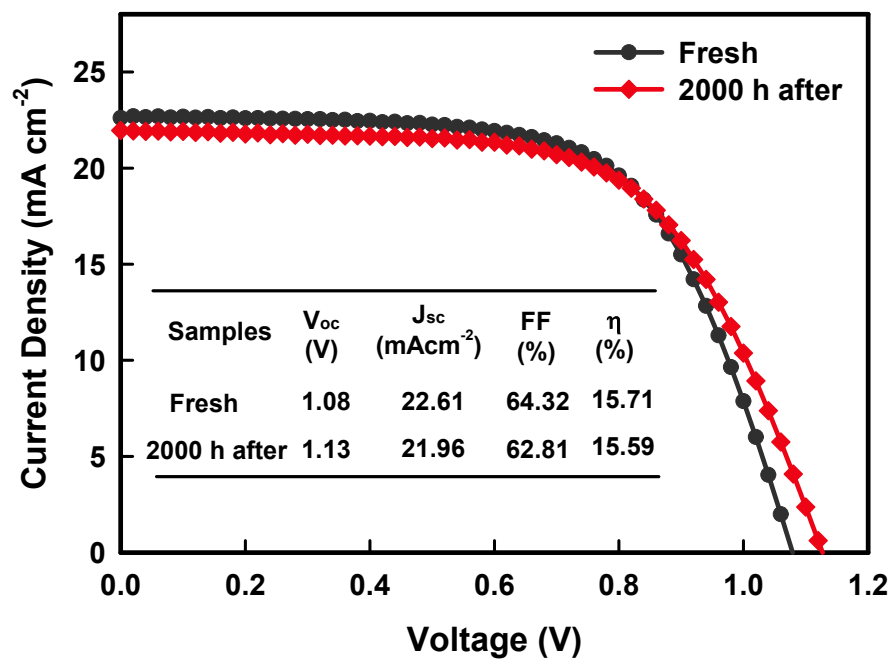

**Figure S10.** J–V curves of the flexible PSC for fresh device and PSC after 2000 h dark storage in ambient air (~20% RH) without encapsulation.
